# Supplementary material for: Physico-chemical characteristics, biocompatibility, and MRI applicability of novel monodisperse PEG-modified magnetic Fe3O4&SiO2core–shell nanoparticles
Source: Royal Society of Chemistry journal article supplement (doi:10.1039/c7ra00224f), 2017-01-01
Supplement: c7ra00224f1.pdf [file c7ra00224f1.pdf]

## Supporting Information

Table S1. Sequence-specific MRI parameters for measurement of  $\text{Fe}_3\text{O}_4\&\text{SiO}_2$  and  $\text{Fe}_3\text{O}_4\&\text{SiO}_2$ -PEG nanoparticles.

|                   | $T_1$ map                                    | $T_2$ map                         | $T_2^*$ map                                       |
|-------------------|----------------------------------------------|-----------------------------------|---------------------------------------------------|
| Sequence          | RARE-VTR sequence                            | MSME sequence with 15 echo images | MGE sequence with 16 echo images                  |
| TR/TE (ms/ms)     | {100, 300, 700, 1,200, 2,000, 3,000, 4500}/6 | 2600/{7, 14, 21, ..., 105}        | TR/ $\alpha$ = 1800/35°, TE= {5, 10, 15, ..., 80} |
| Echo spacing (ms) | 6                                            | 7                                 | 5                                                 |
| RARE factor       | 2                                            | -                                 | -                                                 |
| Navg              | 1                                            | 2                                 | 3                                                 |
| BW (kHz)          | 50                                           | 40                                | 40                                                |
| Scan time         | 4 min, 20 s                                  | 3 min, 54 s                       | 3 min, 3 s                                        |

Table S2. Sequence-specific MRI parameters for scans of mouse brains.

|                       | $T_2$ image                    | $T_2^*$ image                 |
|-----------------------|--------------------------------|-------------------------------|
| Sequence              | TurboRARE sequence (spin echo) | MGE sequence (gradient echo)  |
| TR/TE (ms/ms)         | 2600/26                        | TR/TE/ $\alpha$ = 1200/20/35° |
| Echo spacing (ms)     | 13                             | -                             |
| RARE factor           | 4                              | -                             |
| Navg                  | 16                             | 16                            |
| BW (kHz)              | 40                             | 40                            |
| Pulse bandwidth (kHz) | 2                              | 4                             |
| Total scan time       | 15 min, 56 s                   | 16 min, 38 s                  |

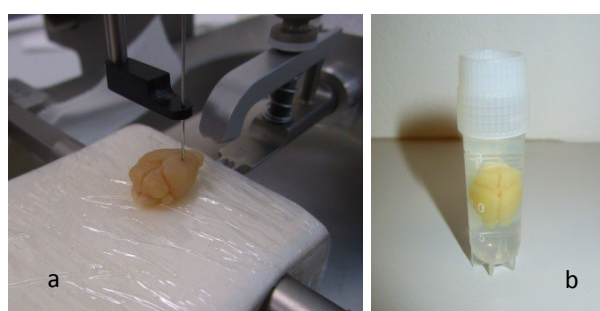

Figure S1. Sample preparation for MRI of  $\text{Fe}_3\text{O}_4\&\text{SiO}_2$  and  $\text{Fe}_3\text{O}_4\&\text{SiO}_2$ -PEG nanoparticles. (a) Stereotaxic injection of particles in mouse brain and (b) *ex vivo* mouse brain with injected particles in a freezer tube.
